# Supplementary material for: High-Throughput Adaptable SARS-CoV-2 Screening for Rapid Identification of Dominant and Emerging Regional Variants
Source: bioRxiv or medRxiv preprint supplement (doi:10.1101/2021.08.31.21262625), 2021-09-08
Supplement: Supplementary file [file media-1.pdf]

## SUPPLEMENTAL TABLES

| <b>Supplemental Table 1: Primers used for qPCR-based screen and qPCR conditions</b> |                     |                                                                                                                                                                     |                                                                                                                                        |                              |
|-------------------------------------------------------------------------------------|---------------------|---------------------------------------------------------------------------------------------------------------------------------------------------------------------|----------------------------------------------------------------------------------------------------------------------------------------|------------------------------|
| <b>Plate</b>                                                                        | <b>Primer Name</b>  | <b>PCR Conditions</b>                                                                                                                                               | <b>Primer Sequence</b>                                                                                                                 | <b>Citation/Source</b>       |
| First plate                                                                         | ORF1ab              | Per Manufacturer's instruction                                                                                                                                      |                                                                                                                                        | Taqpath COVID-19 Combo assay |
|                                                                                     | N gene              | Per Manufacturer's instruction                                                                                                                                      |                                                                                                                                        | Taqpath COVID-19 Combo assay |
|                                                                                     | S gene              | Per Manufacturer's instruction                                                                                                                                      |                                                                                                                                        | Taqpath COVID-19 Combo assay |
| Second Plate                                                                        | ORF1del: Δ3675-3677 | 360 nM of each primer<br>80 nM of each probe<br>25°C, 2 min, 1X<br>52°C, 15 min, 1X<br>94°C, 2 min, 1X<br>94°C, 15 sec, 1X<br>57°C, 40 sec, 45X<br>68°C, 20 sec, 1X | Forward: TGCCTGCTAGTTGGGTGATG<br>Reverse: TGCTGTCATAAGGATTAGTAACACT<br>Probe: 5CY5--GTTTGTCTG /TAO/<br>GTTTTAAGCTAAAAGACTGTG--3IAbrQSp | [6]                          |
|                                                                                     | S protein: N501Y    | 360 nM of each primer<br>80 nM of each probe<br>25°C, 2 min, 1X<br>52°C, 15 min, 1X<br>94°C, 2 min, 1X<br>94°C, 15 sec, 1X<br>57°C, 40 sec, 45X<br>68°C, 20 sec, 1X | Forward: CTGAAATCTATCAGGCCGGTA<br>Reverse: GAAAGTACTACTCTGTATGG<br>Probe: 56-FAM--TTTCCAACCCACTTATGGT--3BHQ_1                          | [7]                          |
|                                                                                     | S protein: E484K    | 400 nM of each primer<br>50°C, 10 min, 1X<br>95°C, 1 min, 1X<br>95°C, 2 min, 40X<br>55°C, 15 sec, 1X                                                                | Forward: ACACCTTGTAAATGGTGTTA<br>Reverse: CTGGTGCAATGTAGAAGTTCA<br>Probe: SYBR Green                                                   | This manuscript              |
|                                                                                     | S protein: L452R    | 360 nM of each primer<br>80 nM of each probe<br>25°C, 2 min, 1X<br>52°C, 15 min, 1X<br>94°C, 2 min, 1X<br>94°C, 15 sec, 1X<br>57°C, 40 sec, 45X<br>68°C, 20 sec, 1X | Forward: CTCTCTCAAAGGTTTGAGATTAGACT<br>Reverse: CTTGATTCTAAGTTGGTGTTAA<br>Probe: HEX--CCTAAACAATCTATACCGGTAATT--3BHQ_1                 | [7]                          |

| <b>Supplemental Table 2: Prevalence of genomic changes in GISAID samples<br/>05/21/21-08/04/21</b> |                    |                              |                   |                    |                     |                     |
|----------------------------------------------------------------------------------------------------|--------------------|------------------------------|-------------------|--------------------|---------------------|---------------------|
| <b>Strain</b>                                                                                      | <b>Strain Type</b> | <b># of GISAID sequences</b> | <b>ORF1del(%)</b> | <b>S:N501Y (%)</b> | <b>S: E484K (%)</b> | <b>S: L452R (%)</b> |
| Alpha (B.1.1.7)                                                                                    | VoC                | 115403                       | 96.5              | 97.8               | 0.8                 | 0.1                 |
| Beta (B.1.351)                                                                                     | VoC                | 2988                         | 90.9              | 87.6               | 87.2                | 0.3                 |
| Gamma (P.1)                                                                                        | VoC                | 18685                        | 97.6              | 95.3               | 94.9                | 0.0                 |
| Delta (B.1.617.2, AY.3)                                                                            | VoC                | 418169                       | 0.1               | 0.1                | 0.0                 | 98.0                |
| Eta (B.1.525)                                                                                      | Vol                | 560                          | 95.4              | 0.4                | 97.3                | 0.0                 |
| Ito (B.1.526)                                                                                      | Vol                | 1949                         | 96.9              | 0.1                | 78.0                | 0.0                 |

**Supplemental Table 3: Example ruleset for calling of Variants on qPCR-based Screen**

| <b>ORF1ab</b> | <b>N gene</b> | <b>S gene</b>                        | <b>ORF1 del:<br/>Δ3675-3677</b> | <b>S: N501Y</b> | <b>S: E484K</b>                 | <b>S: L452</b> | <b><u>Interpretation</u></b>     |
|---------------|---------------|--------------------------------------|---------------------------------|-----------------|---------------------------------|----------------|----------------------------------|
| CT< 40        | CT<40         | (S gene CT) –<br>(N gene CT) =<<br>6 | CT<40                           | CT<40           | (E484K CT) – (N<br>gene CT) =<5 | CT<40          |                                  |
| TRUE          | TRUE          | FALSE                                | FALSE                           | TRUE            | FALSE                           | FALSE          | <b>Alpha (B.1.1.7)</b>           |
| TRUE          | TRUE          | FALSE                                | FALSE                           | TRUE            | TRUE                            | FALSE          | <b>Alpha<br/>(B.1.1.7+E484K)</b> |
| TRUE          | TRUE          | TRUE                                 | FALSE                           | TRUE            | TRUE                            | FALSE          | <b>Gamma or Beta</b>             |
| TRUE          | TRUE          | TRUE                                 | TRUE                            | FALSE           | FALSE                           | TRUE           | <b>Delta</b>                     |
| TRUE          | TRUE          | FALSE                                | FALSE                           | FALSE           | TRUE                            | FALSE          | <b>Eta</b>                       |
| TRUE          | TRUE          | TRUE                                 | FALSE                           | FALSE           | TRUE                            | FALSE          | <b>Iota</b>                      |
| TRUE          | TRUE          | TRUE                                 | FALSE                           | FALSE           | FALSE                           | TRUE           | <b>B.1.526.1</b>                 |
| TRUE          | TRUE          | TRUE                                 | FALSE                           | FALSE           | FALSE                           | FALSE          | <b>B.1.526.2</b>                 |
| TRUE          | TRUE          | TRUE                                 | TRUE                            | TRUE            | TRUE                            | FALSE          | <b>B.1.621</b>                   |
| TRUE          | TRUE          | TRUE                                 | TRUE                            | FALSE           | TRUE                            | FALSE          | <b>P.2</b>                       |

## SUPPLEMENTAL FIGURES

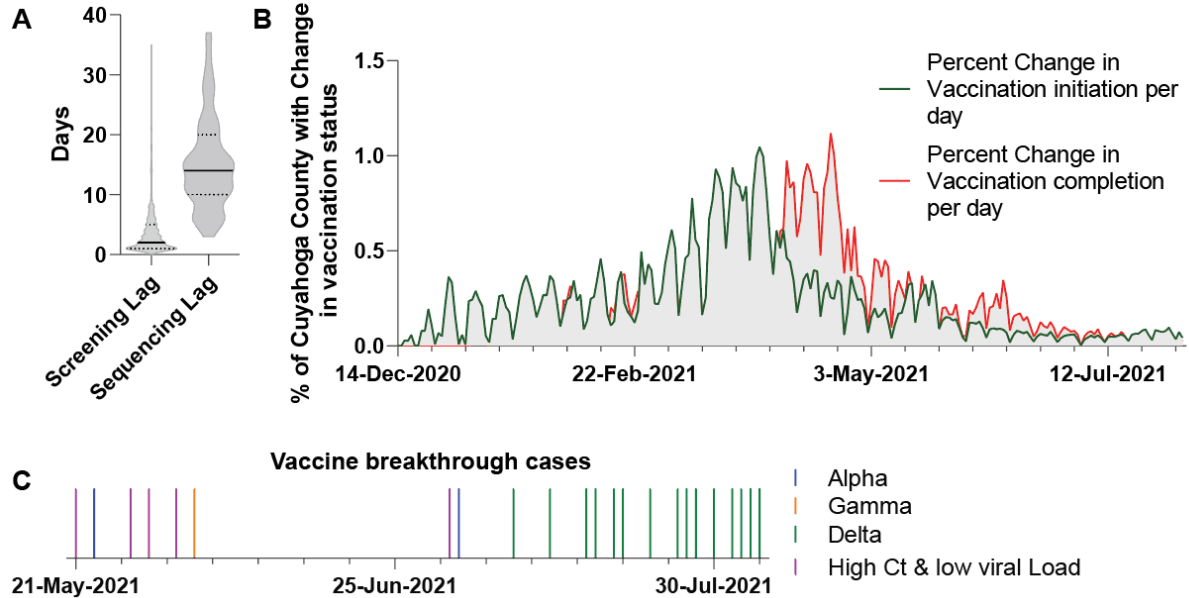

**Supplemental Figure 1:** A) Elapsed time between collection, screening and sequencing for all samples analyzed. Solid line indicates the median, quartiles indicated with dotted lines. B) Cuyahoga County vaccination initiation and completion rates as a percentage of the population. C) Incidence of positive SARS-CoV-2 tests over time per variant. Each line indicates one positive result. Colors indicate the variant identified or high Ct, respectively.

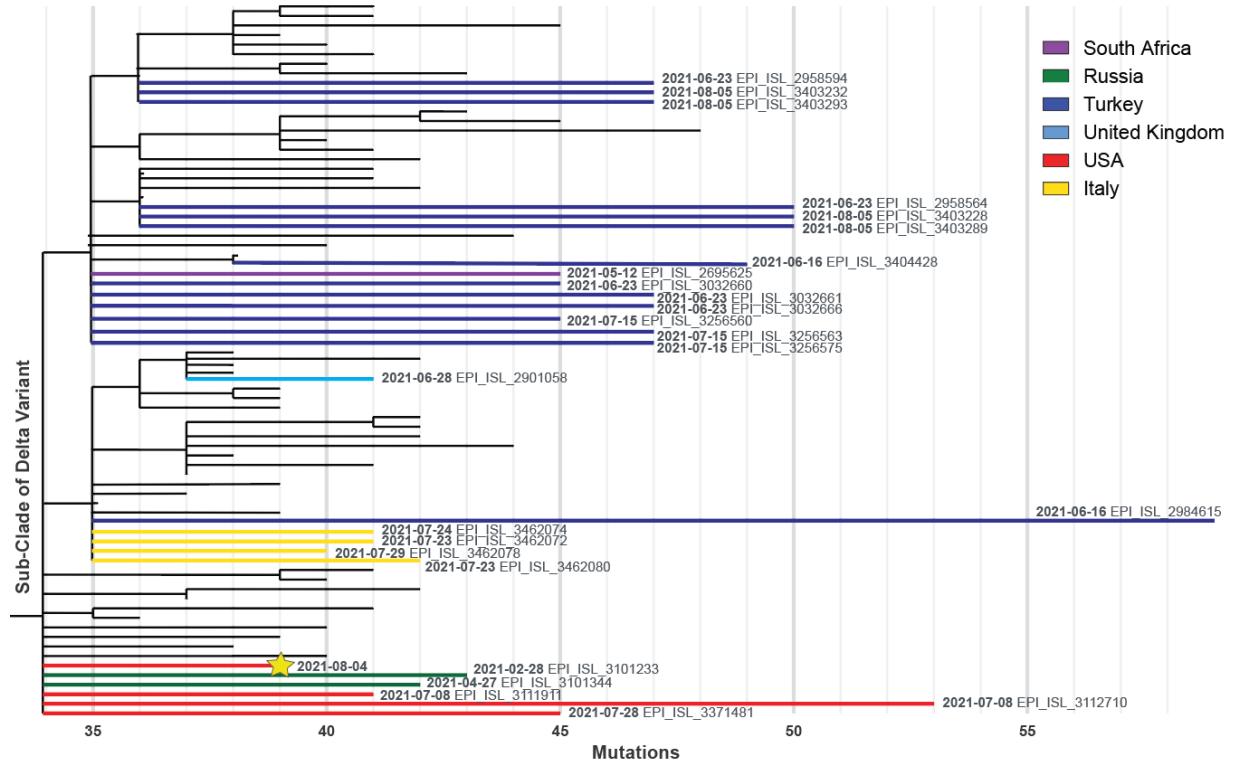

**Supplemental Figure 2:** Subset of Nextclade phylogenetic tree containing the Delta+E484K sample (indicated with star) and most closely related Delta+E484K samples. Delta variant reference samples are shown in black lines. For Delta+E484K samples, country of origin labeled with colors per legend, date sample was collected in bold, and Accession ID's indicated.

## REFERENCES (as per main text)

- Vogels, C.B.F., et al., Multiplex qPCR discriminates variants of concern to enhance global surveillance of SARS-CoV-2. *PLoS Biol*, 2021. 19(5): p. e3001236.
- Wang, H., et al., Multiplex SARS-CoV-2 Genotyping Reverse Transcriptase PCR for Population-Level Variant Screening and Epidemiologic Surveillance. *J Clin Microbiol*, 2021. 59(8): p. e0085921.
